# Supplementary material
Source: Springer Nature journal article supplement (https://www.springermedizin.de/resource/supplementary/12936_2013_3122_MOESM10_ESM.pdf/9546210)

# Vivax malaria cases

350,000

300,000

250,000

200,000

150,000

100,000

50,000

0

1999

2001

2003

2005

2007

5

4.5

4

3.5

3

2.5

2

1.5

1

0.5

0

◆ Malaria cases

▲ Malaria morbidity in Pyonyang per 1,000

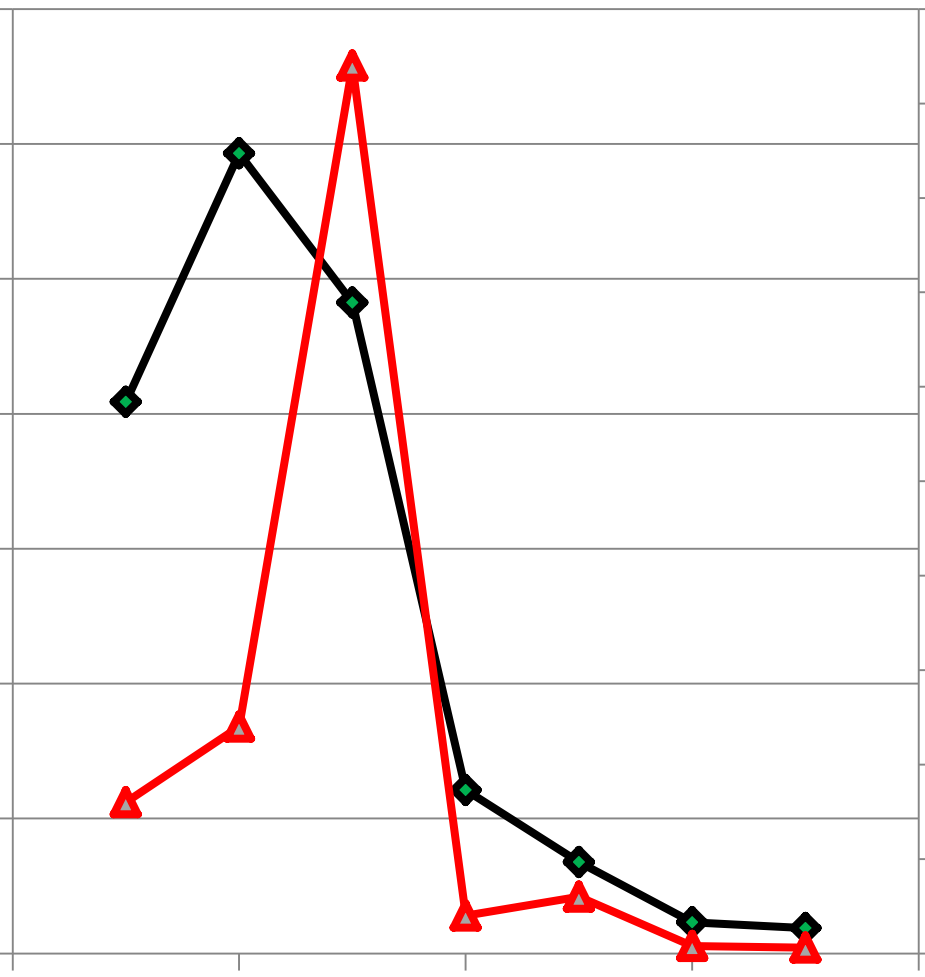

Supplement: MOESM10 [file 9546210]
